# Supplementary material for: Hydrothermal preparation of a platinum-loaded sulphated nanozirconia catalyst for the effective conversion of waste low density polyethylene into gasoline-range hydrocarbons
Source: Royal Society of Chemistry journal article supplement (doi:10.1039/c9ra08834b), 2019-01-01
Supplement: c9ra08834b1.pdf [file c9ra08834b1.pdf]

## Electronic Supplementary Information (ESI)

**Hydrothermal preparation of a platinum-loaded sulphated nanozirconia catalyst for the effective conversion of waste low density polyethylene into gasoline-range hydrocarbons**

Maisari Utami<sup>a,b</sup>, Wega Trisunaryanti<sup>b</sup>, Kenji Shida<sup>c</sup>, Masayuki Tsushida<sup>c</sup>,  
Hidetaka Kawakita<sup>d</sup>, Keisuke Ohto<sup>d</sup>, Karna Wijaya<sup>b,\*</sup> and Masato Tominaga<sup>d,\*</sup>

<sup>a</sup>Department of Chemistry, Universitas Islam Indonesia, Yogyakarta 55584, Indonesia

<sup>b</sup>Department of Chemistry, Universitas Gadjah Mada, Yogyakarta 55281, Indonesia

<sup>c</sup>Faculty of Engineering, Kumamoto University, Kumamoto 860-8555, Japan

<sup>d</sup>Department of Chemistry and Applied Chemistry, Saga University, Saga 840-8502, Japan

\*e-mail: masato@cc.saga-u.ac.jp, karnawijaya@ugm.ac.id

Corresponding authors:

Masato Tominaga

*Department of Chemistry and Applied Chemistry, Saga University, Saga 840-8502, Japan.*

Email: masato@cc.saga-u.ac.jp

Tel/Fax: +81-96-342-3655

Karna Wijaya

*Department of Chemistry, Universitas Gadjah Mada, Yogyakarta 55281, Indonesia.*

Email: karnawijaya@ugm.ac.id

Tel: +62-812-269-2493

## Experimental

### Characterization of Pt/nanoZrO<sub>2</sub>-SO<sub>4</sub> reaction products using GC-MS

The GC-MS analyses were performed using a Shimadzu QP 2010S (Japan) with electron ionization detector and Helium as the carrier gas. An Rtxi-5MS column (length 30 m, diameter 0.25 mm and thickness 0.25  $\mu$ m) was employed, with an initial oven temperature of 50 °C (held for 5 min), followed by an increase to 300 °C at 5 °C/min and a final hold for 15 min. The injection inlet temperature was 310 °C. The individual components of each sample were identified by matching their mass spectra with standard spectra in the NIST 08 and WILEY 8 libraries, using the software system associated with the instrument.

## Results and discussion

The hydrocarbons generated from the hydrocracking of waste LDPE over the nanoZrO<sub>2</sub>, nanoZrO<sub>2</sub>-SO<sub>4</sub> and Pt/nanoZrO<sub>2</sub>-SO<sub>4</sub> were almost exclusively olefins and linear paraffins with a wide range of molecular weights. Large amounts of linear paraffins and olefins were generated, with proportions of 32.73% and 49.50%, respectively. The majority of these compounds in the hydrocracking experiments were associated with extensive random-chain scission occurring in the pyrolysis step. However, the presence of isoparaffins, naphthenes and aromatics in the gasoline fraction is highly desirable, as these compounds increase the octane number. The products obtained from the hydrocracking reaction over Pt/nanoZrO<sub>2</sub>-SO<sub>4</sub> showed the highest proportions of these compounds (5.39%, 8.46% and 1.16%, respectively). Future work involving nanozirconia-based catalysts should be able to advance the techniques reported in this paper, especially with regard to tuning the conversion reactions to induce isomerization and aromatization.

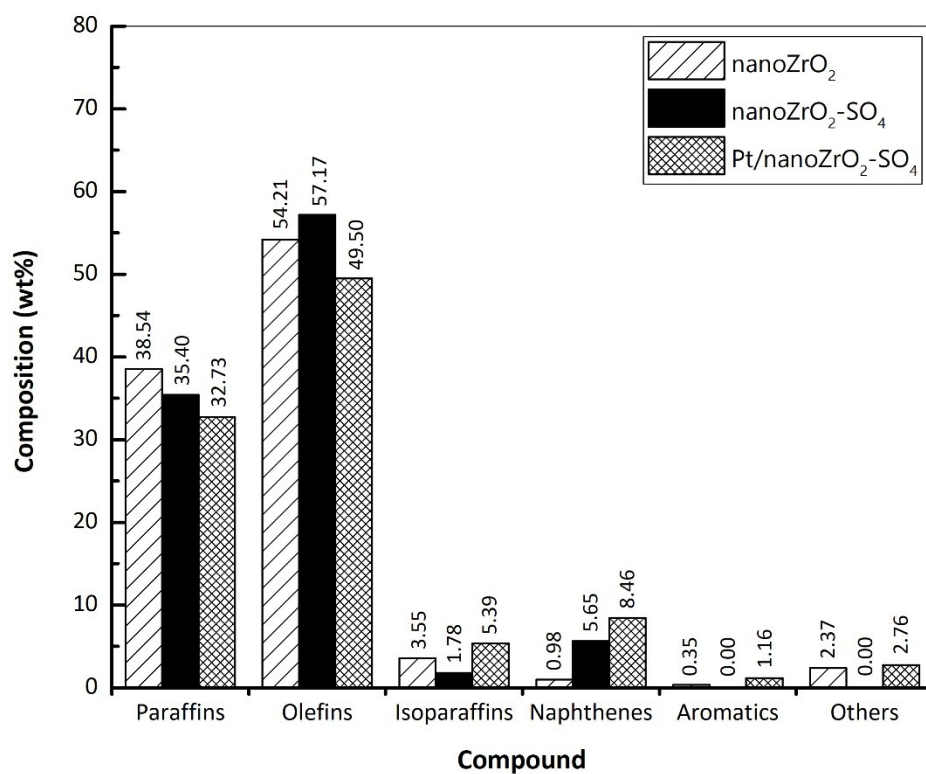

**Fig. S1** The chemical compositions of the liquids obtained from the hydrocracking of waste LDPE over nanoZrO<sub>2</sub>, nanoZrO<sub>2</sub>-SO<sub>4</sub> and Pt/nanoZrO<sub>2</sub>-SO<sub>4</sub> (T = 250 °C, t = 60 min, catalyst-to-feed proportion = 1 wt%).

**Table S1** The chemical compositions of pyrolysis oil and hydrocracking oil over nanoZrO<sub>2</sub>, nanoZrO<sub>2</sub>/SO<sub>4</sub> and Pt/nanoZrO<sub>2</sub>-SO<sub>4</sub>

| Sample                                   | Composition (%) | Chemical compound       |
|------------------------------------------|-----------------|-------------------------|
| pyrolysis oil                            | 23.9            | 1-decene                |
|                                          | 21.3            | 1-undecanol             |
|                                          | 14.5            | 2,3,5-trimethyldecane   |
|                                          | 21.4            | 1-tridecene             |
|                                          | 18.9            | 3-methyl-5-propylnonane |
| nanoZrO <sub>2</sub>                     | 2.7             | methylbenzene           |
|                                          | 10.9            | 2,4-dimethylheptane     |
|                                          | 5.1             | 3-methylnonane          |
|                                          | 77.1            | 1-undecene              |
|                                          | 4.2             | Butylcyclohexane        |
| nanoZrO <sub>2</sub> -SO <sub>4</sub>    | 11.5            | <i>n</i> -oktane        |
|                                          | 3.3             | ethylcyclohexane        |
|                                          | 48.7            | 1-decene                |
|                                          | 34.2            | <i>n</i> -decane        |
|                                          | 2.3             | 3-methyldecane          |
| Pt/nanoZrO <sub>2</sub> -SO <sub>4</sub> | 17.2            | <i>n</i> -heptane       |
|                                          | 4.5             | methylcyclohexane       |
|                                          | 3.5             | methylbenzene           |
|                                          | 34.5            | 2,4-dimethylhexane      |
|                                          | 40.3            | 1-nonene                |

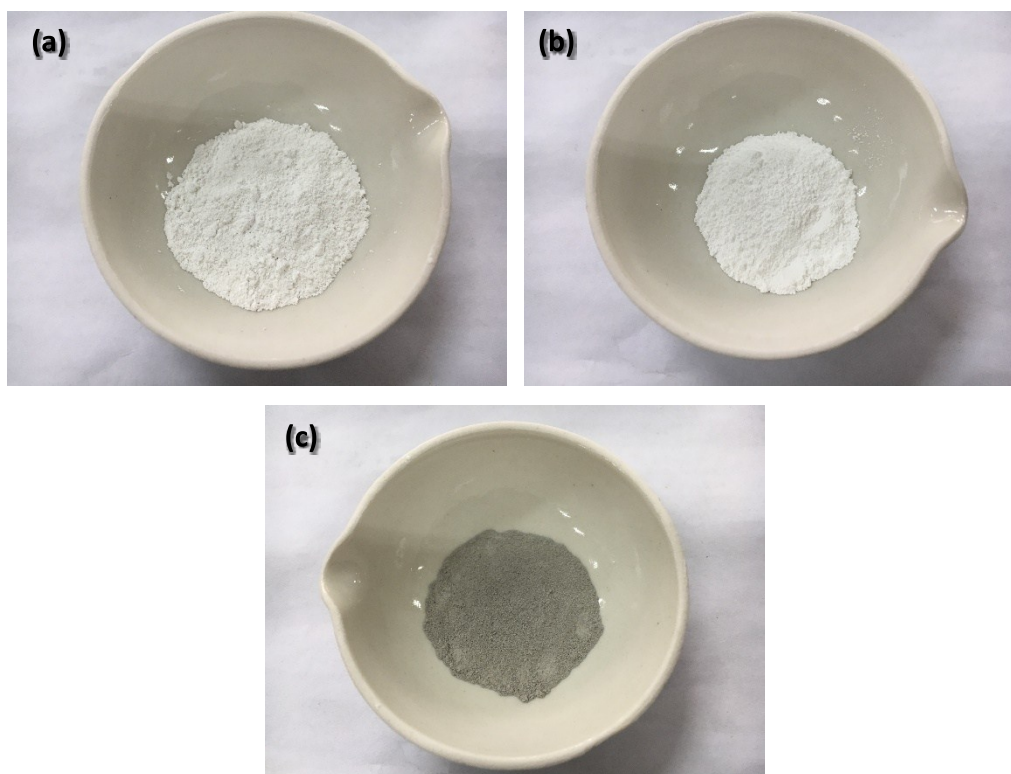

**Fig. S2** Photographic images of (a)  $\text{nanoZrO}_2$ , (b)  $\text{nanoZrO}_2\text{-SO}_4$  and (c)  $\text{Pt/nanoZrO}_2\text{-SO}_4$  catalysts.

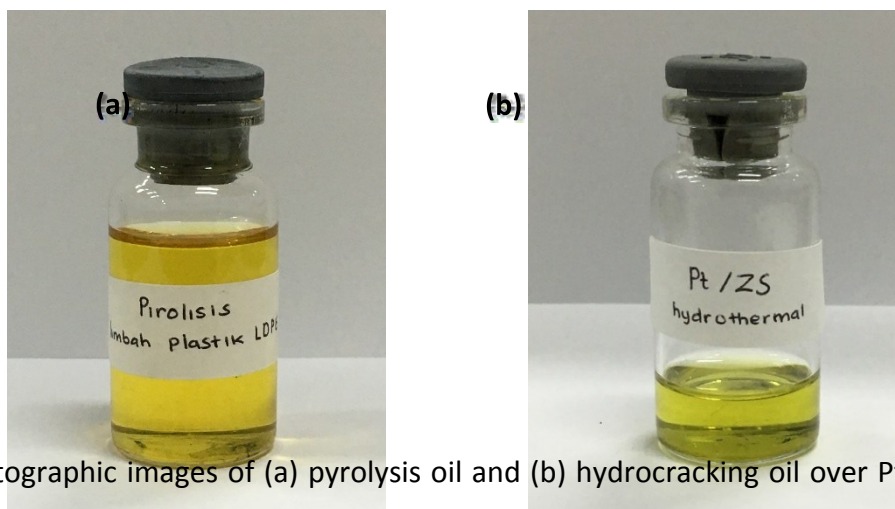

**Fig. S3** Photographic images of (a) pyrolysis oil and (b) hydrocracking oil over Pt/nanoZrO<sub>2</sub>-SO<sub>4</sub>.
